# Supplementary material for: Complete protection of the BALB/c and C57BL/6J mice against Ebola and Marburg virus lethal challenges by pan-filovirus T-cell epigraph vaccine
Source: PubMed Central journal article supplement (PMC6394903; doi:10.1371/journal.ppat.1007564), 2019-02-28
Supplement: ppat.1007564.s001.pdf [file ppat.1007564.s001.pdf]

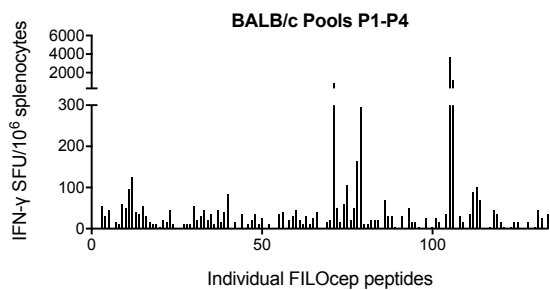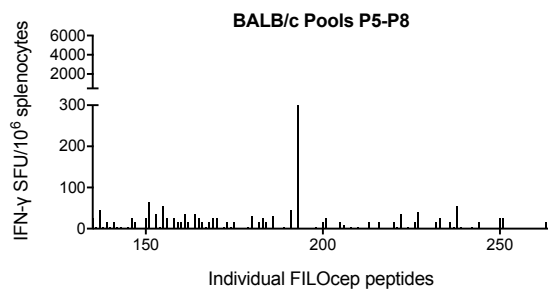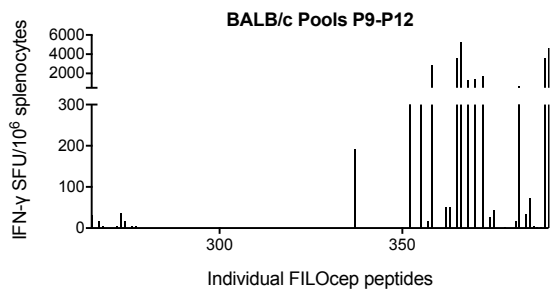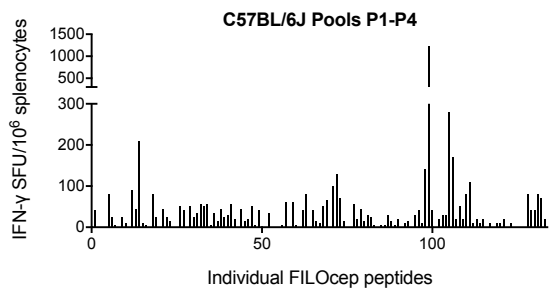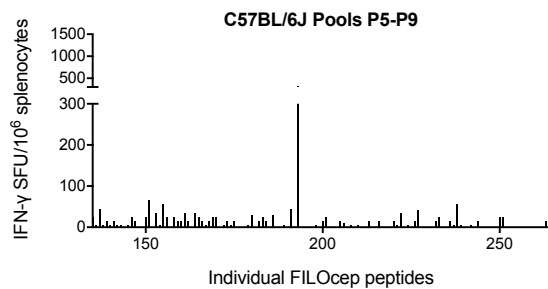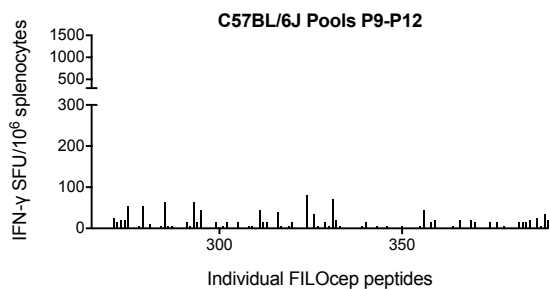

**S1 Fig. Mapping of stimulatory 15-mer peptides in the BALB/c and C57BL/6J strains of mice.** Groups of mice were immunized using the ChAdOx1.FILOcep1+ChAdOx1.FILOcep2 prime and MVA.FILOcep1+MVA.FILOcep2 boost regimen and the immune splenocytes were tested using the IFN- $\gamma$  ELISPOT assay against 390 individual peptides corresponding to the FILOcep1&2 immunogens.
