# Supplementary material for: Complete protection of the BALB/c and C57BL/6J mice against Ebola and Marburg virus lethal challenges by pan-filovirus T-cell epigraph vaccine
Source: PubMed Central journal article supplement (PMC6394903; doi:10.1371/journal.ppat.1007564), 2019-02-28
Supplement: ppat.1007564.s002.pdf [file ppat.1007564.s002.pdf]

Fig 2A-2

| Table format:<br>Grouped |     | Group A                   |      |      | Group B                   |       |      | Group C                   |      |      | Group D                   |      |        |
|--------------------------|-----|---------------------------|------|------|---------------------------|-------|------|---------------------------|------|------|---------------------------|------|--------|
|                          |     | 1x10 <sup>6</sup> IU dose |      |      | 1x10 <sup>7</sup> IU dose |       |      | 1x10 <sup>8</sup> IU dose |      |      | 5x10 <sup>8</sup> IU dose |      |        |
|                          | ✕   | A:Y1                      | A:Y2 | A:Y3 | B:Y1                      | B:Y2  | B:Y3 | C:Y1                      | C:Y2 | C:Y3 | D:Y1                      | D:Y2 | D:Y3   |
| 1                        | P1  | 55                        | 25.0 | 0    | 2.5                       | 27.5  | 20   | 10                        | 0    | 90   | 5                         | 10   | 35.0   |
| 2                        | P2  | 5                         | 15.0 | 10   | 12.5                      | 117.5 | 10   | 40                        | 0    | 10   | 0                         | 80   | 2.5    |
| 3                        | P3  | 50                        | 2.5  | 70   | 175.0                     | 175.0 | 260  | 2180                      | 820  | 1940 | 1390                      | 1010 | 1155.0 |
| 4                        | P4  | 15                        | 22.5 | 0    | 5.0                       | 7.5   | 50   | 60                        | 0    | 30   | 25                        | 20   | 15.0   |
| 5                        | P5  | 0                         | 5.0  | 10   | 35.0                      | 0.0   | 5    | 30                        | 0    | 30   | 0                         | 0    | 12.5   |
| 6                        | P6  | 15                        | 12.5 | 10   | 22.5                      | 0.0   | 5    | 70                        | 10   | 50   | 0                         | 60   | 12.5   |
| 7                        | P7  | 0                         | 0.0  | 10   | 25.0                      | 0.0   | 5    | 60                        | 0    | 30   | 45                        | 10   | 2.5    |
| 8                        | P8  | 55                        | 2.5  | 0    | 35.0                      | 7.5   | 10   | 50                        | 30   | 90   | 0                         | 30   | 95.0   |
| 9                        | P9  | 25                        | 35.0 | 10   | 35.0                      | 7.5   | 70   | 70                        | 0    | 60   | 25                        | 0    | 32.5   |
| 10                       | P10 | 15                        | 15.0 | 10   | 15.0                      | 17.5  | 45   | 130                       | 0    | 240  | 80                        | 110  | 72.5   |
| 11                       | P11 | 0                         | 0.0  | 10   | 25.0                      | 7.5   | 0    | 40                        | 0    | 90   | 30                        | 50   | 15.0   |
| 12                       | P12 | 110                       | 12.5 | 60   | 65.0                      | 145.0 | 40   | 74                        | 570  | 690  | 480                       | 750  | 515.0  |

Fig 2A-3

|    |     | Group A                   |      |       | Group B                   |      |       | Group C                   |      |      | Group D                   |      |      |
|----|-----|---------------------------|------|-------|---------------------------|------|-------|---------------------------|------|------|---------------------------|------|------|
|    |     | 1x10 <sup>6</sup> IU dose |      |       | 1x10 <sup>7</sup> IU dose |      |       | 1x10 <sup>8</sup> IU dose |      |      | 5x10 <sup>8</sup> IU dose |      |      |
|    | ⊗   | A:Y1                      | A:Y2 | A:Y3  | B:Y1                      | B:Y2 | B:Y3  | C:Y1                      | C:Y2 | C:Y3 | D:Y1                      | D:Y2 | D:Y3 |
| 1  | P1  | 0.0                       | 10   | 25.0  | 0.0                       | 160  | 65.0  | 395                       | 265  | 250  | 200                       | 265  | 240  |
| 2  | P2  | 55.0                      | 30   | 7.5   | 0.0                       | 105  | 17.5  | 5                         | 65   | 0    | 0                         | 45   | 25   |
| 3  | P3  | 27.5                      | 190  | 125.0 | 305.0                     | 550  | 245.0 | 805                       | 705  | 1180 | 820                       | 1485 | 1370 |
| 4  | P4  | 7.5                       | 30   | 55.0  | 32.5                      | 25   | 45.0  | 85                        | 55   | 20   | 40                        | 35   | 5    |
| 5  | P5  | 0.0                       | 0    | 0.0   | 0.0                       | 15   | 15.0  | 5                         | 35   | 40   | 90                        | 15   | 120  |
| 6  | P6  | 47.5                      | 10   | 47.5  | 12.5                      | 10   | 17.5  | 5                         | 15   | 10   | 100                       | 65   | 140  |
| 7  | P7  | 0.0                       | 40   | 7.5   | 5.0                       | 50   | 27.5  | 85                        | 85   | 180  | 40                        | 255  | 160  |
| 8  | P8  | 0.0                       | 20   | 17.5  | 0.0                       | 60   | 7.5   | 175                       | 95   | 160  | 50                        | 0    | 140  |
| 9  | P9  | 0.0                       | 10   | 17.5  | 12.5                      | 20   | 0.0   | 65                        | 45   | 0    | 0                         | 85   | 50   |
| 10 | P10 | 7.5                       | 0    | 47.5  | 2.5                       | 20   | 35.0  | 55                        | 165  | 50   | 60                        | 185  | 110  |
| 11 | P11 | 0.0                       | 10   | 0.0   | 0.0                       | 5    | 15.0  | 95                        | 55   | 100  | 80                        | 25   | 90   |
| 12 | P12 | 215.0                     | 130  | 275.0 | 395.0                     | 550  | 305.0 | 2035                      | 1935 | 3150 | 1610                      | 2635 | 1900 |

Fig 2A-4

| Table format:<br>Grouped |     | Group A          |        |      | Group B          |      |      | Group C            |      |      |
|--------------------------|-----|------------------|--------|------|------------------|------|------|--------------------|------|------|
|                          |     | ChAdOx1.EBOVcep1 |        |      | ChAdOx1.EBOVcep2 |      |      | ChAdOx1.EBOVcep1+2 |      |      |
|                          | ⊗   | A:Y1             | A:Y2   | A:Y3 | B:Y1             | B:Y2 | B:Y3 | C:Y1               | C:Y2 | C:Y3 |
| 1                        | P1  | 125.0            | 295.0  | 14   | 10               | 0    | 90   | 395                | 265  | 250  |
| 2                        | P2  | 27.5             | 2.5    | 5    | 40               | 0    | 10   | 5                  | 65   | 0    |
| 3                        | P3  | 395.0            | 295.0  | 260  | 2180             | 820  | 1940 | 805                | 705  | 1180 |
| 4                        | P4  | 95.0             | 15.0   | 5    | 60               | 0    | 30   | 85                 | 55   | 20   |
| 5                        | P5  | 55.0             | 85.0   | 120  | 30               | 0    | 30   | 5                  | 35   | 40   |
| 6                        | P6  | 55.0             | 45.0   | 15   | 70               | 10   | 50   | 5                  | 15   | 10   |
| 7                        | P7  | 245.0            | 185.0  | 30   | 60               | 0    | 30   | 85                 | 85   | 180  |
| 8                        | P8  | 105.0            | 75.0   | 5    | 50               | 30   | 90   | 175                | 95   | 160  |
| 9                        | P9  | 7.5              | 35.0   | 0    | 70               | 0    | 60   | 65                 | 45   | 0    |
| 10                       | P10 | 185.0            | 75.0   | 0    | 130              | 0    | 240  | 55                 | 165  | 50   |
| 11                       | P11 | 0.0              | 42.5   | 50   | 40               | 0    | 90   | 95                 | 55   | 100  |
| 12                       | P12 | 1765.0           | 1935.0 | 1070 | 74               | 570  | 690  | 2035               | 1935 | 3150 |

Fig 2B-5

| Table format:<br>Grouped |     | Group A                    |      |      | Group B                    |       |      | Group C                    |       |      | Group D                    |      |      |
|--------------------------|-----|----------------------------|------|------|----------------------------|-------|------|----------------------------|-------|------|----------------------------|------|------|
|                          |     | 1X10 <sup>5</sup> PFU dose |      |      | 1x10 <sup>6</sup> PFU dose |       |      | 5x10 <sup>6</sup> PFU dose |       |      | 1x10 <sup>7</sup> PFU dose |      |      |
|                          | ⊗   | A:Y1                       | A:Y2 | A:Y3 | B:Y1                       | B:Y2  | B:Y3 | C:Y1                       | C:Y2  | C:Y3 | D:Y1                       | D:Y2 | D:Y3 |
| 1                        | P1  | 30.0                       | 17.5 | 30.0 | 0.0                        | 155.0 | 60   | 175.0                      | 35.0  | 130  | 10.0                       | 30   | 5.0  |
| 2                        | P2  | 10.0                       | 35.0 | 30.0 | 0.0                        | 395.0 | 30   | 137.5                      | 132.5 | 45   | 35.0                       | 60   | 0.0  |
| 3                        | P3  | 50.0                       | 17.5 | 50.0 | 0.0                        | 325.0 | 0    | 235.0                      | 85.0  | 220  | 30.0                       | 150  | 45.0 |
| 4                        | P4  | 20.0                       | 17.5 | 50.0 | 0.0                        | 235.0 | 20   | 195.0                      | 85.0  | 15   | 30.0                       | 100  | 57.5 |
| 5                        | P5  | 0.0                        | 0.0  | 60.0 | 0.0                        | 85.0  | 160  | 125.0                      | 25.0  | 90   | 50.0                       | 40   | 35.0 |
| 6                        | P6  | 40.0                       | 0.0  | 35.0 | 17.5                       | 145.0 | 90   | 295.0                      | 45.0  | 45   | 130.0                      | 10   | 15.0 |
| 7                        | P7  | 20.0                       | 0.0  | 0.0  | 0.0                        | 145.0 | 100  | 175.0                      | 25.0  | 230  | 60.0                       | 30   | 35.0 |
| 8                        | P8  | 0.0                        | 17.5 | 0.0  | 0.0                        | 107.5 | 30   | 175.0                      | 85.0  | 85   | 50.0                       | 60   | 35.0 |
| 9                        | P9  | 0.0                        | 0.0  | 10.0 | 0.0                        | 105.0 | 80   | 67.5                       | 35.0  | 0    | 70.0                       | 0    | 0.0  |
| 10                       | P10 | 0.0                        | 17.5 | 0.0  | 0.0                        | 135.0 | 80   | 325.0                      | 105.0 | 0    | 40.0                       | 60   | 75.0 |
| 11                       | P11 | 0.0                        | 0.0  | 0.0  | 45.0                       | 215.0 | 200  | 0.0                        | 32.5  | 220  | 70.0                       | 130  | 35.0 |
| 12                       | P12 | 50.0                       | 55.0 | 20.0 | 85.0                       | 245.0 | 30   | 255.0                      | 85.0  | 200  | 100.0                      | 90   | 35.0 |

Fig 2B-6

| Table format:<br>Grouped |     | Group A                    |       |      | Group B                    |       |      | Group C                    |      |      | Group D                    |      |       |
|--------------------------|-----|----------------------------|-------|------|----------------------------|-------|------|----------------------------|------|------|----------------------------|------|-------|
|                          |     | 1X10 <sup>5</sup> PFU dose |       |      | 1x10 <sup>6</sup> PFU dose |       |      | 5x10 <sup>6</sup> PFU dose |      |      | 1x10 <sup>7</sup> PFU dose |      |       |
|                          | ⊗   | A:Y1                       | A:Y2  | A:Y3 | B:Y1                       | B:Y2  | B:Y3 | C:Y1                       | C:Y2 | C:Y3 | D:Y1                       | D:Y2 | D:Y3  |
| 1                        | P1  | 0                          | 65.0  | 0    | 12.5                       | 27.5  | 110  | 120                        | 0    | 50   | 0                          | 10   | 45.0  |
| 2                        | P2  | 15                         | 35.0  | 10   | 42.5                       | 47.5  | 80   | 70                         | 0    | 70   | 0                          | 10   | 52.5  |
| 3                        | P3  | 120                        | 132.5 | 150  | 205.0                      | 185.0 | 370  | 210                        | 432  | 220  | 80                         | 160  | 255.0 |
| 4                        | P4  | 35                         | 22.5  | 0    | 35.0                       | 0.0   | 140  | 0                          | 0    | 50   | 0                          | 0    | 125.0 |
| 5                        | P5  | 0                          | 55.0  | 50   | 85.0                       | 0.0   | 25   | 70                         | 0    | 0    | 0                          | 20   | 22.5  |
| 6                        | P6  | 65                         | 22.5  | 20   | 32.5                       | 0.0   | 15   | 70                         | 10   | 70   | 0                          | 20   | 42.5  |
| 7                        | P7  | 0                          | 0.0   | 30   | 35.0                       | 0.0   | 55   | 90                         | 0    | 20   | 25                         | 10   | 2.5   |
| 8                        | P8  | 5                          | 2.5   | 10   | 45.0                       | 47.5  | 90   | 80                         | 50   | 60   | 0                          | 10   | 5.0   |
| 9                        | P9  | 0                          | 45.0  | 10   | 65.0                       | 7.5   | 70   | 10                         | 30   | 10   | 0                          | 50   | 12.5  |
| 10                       | P10 | 5                          | 5.0   | 20   | 45.0                       | 0.0   | 35   | 60                         | 0    | 60   | 30                         | 60   | 12.5  |
| 11                       | P11 | 0                          | 0.0   | 0    | 45.0                       | 7.5   | 0    | 110                        | 0    | 80   | 20                         | 60   | 45.0  |
| 12                       | P12 | 0                          | 0.0   | 110  | 105.0                      | 15.0  | 160  | 160                        | 180  | 60   | 70                         | 20   | 95.0  |

Fig 2B-7

| Table format:<br>Grouped |     | Group A                    |      |       | Group B                    |      |       | Group C                    |      |      | Group D                    |       |      |
|--------------------------|-----|----------------------------|------|-------|----------------------------|------|-------|----------------------------|------|------|----------------------------|-------|------|
|                          |     | 1x10 <sup>5</sup> PFU dose |      |       | 1x10 <sup>6</sup> PFU dose |      |       | 5x10 <sup>6</sup> PFU dose |      |      | 1x10 <sup>7</sup> PFU dose |       |      |
|                          | ⊗   | A:Y1                       | A:Y2 | A:Y3  | B:Y1                       | B:Y2 | B:Y3  | C:Y1                       | C:Y2 | C:Y3 | D:Y1                       | D:Y2  | D:Y3 |
| 1                        | P1  | 0.0                        | 10   | 5.0   | 0.0                        | 10   | 55.0  | 125                        | 95   | 60   | 150                        | 85.0  | 150  |
| 2                        | P2  | 0.0                        | 0    | 27.5  | 0.0                        | 55   | 27.5  | 105                        | 105  | 10   | 0                          | 52.5  | 45   |
| 3                        | P3  | 0.0                        | 70   | 115.0 | 25.0                       | 170  | 215.0 | 165                        | 155  | 160  | 220                        | 345.0 | 170  |
| 4                        | P4  | 0.0                        | 0    | 95.0  | 0.0                        | 45   | 65.0  | 65                         | 95   | 40   | 120                        | 115.0 | 45   |
| 5                        | P5  | 0.0                        | 0    | 0.0   | 0.0                        | 15   | 75.0  | 55                         | 0    | 0    | 90                         | 65.0  | 50   |
| 6                        | P6  | 0.0                        | 0    | 17.5  | 12.5                       | 10   | 47.5  | 55                         | 15   | 70   | 110                        | 85.0  | 80   |
| 7                        | P7  | 0.0                        | 0    | 0.0   | 0.0                        | 0    | 37.5  | 75                         | 75   | 70   | 70                         | 55.0  | 0    |
| 8                        | P8  | 0.0                        | 0    | 27.5  | 0.0                        | 0    | 0.0   | 25                         | 115  | 40   | 40                         | 0.0   | 40   |
| 9                        | P9  | 0.0                        | 0    | 0.0   | 22.5                       | 0    | 0.0   | 65                         | 65   | 20   | 0                          | 75.0  | 60   |
| 10                       | P10 | 0.0                        | 0    | 27.5  | 0.0                        | 40   | 35.0  | 65                         | 65   | 60   | 190                        | 175.0 | 0    |
| 11                       | P11 | 0.0                        | 0    | 0.0   | 0.0                        | 55   | 75.0  | 55                         | 35   | 40   | 160                        | 75.0  | 40   |
| 12                       | P12 | 0.0                        | 0    | 15.0  | 5.0                        | 10   | 105.0 | 105                        | 165  | 60   | 150                        | 125.0 | 90   |

Fig 2B-8

| Table format:<br>Grouped |     | Group A                    |      |       | Group B                    |      |       | Group C                    |      |      | Group D                    |       |      |
|--------------------------|-----|----------------------------|------|-------|----------------------------|------|-------|----------------------------|------|------|----------------------------|-------|------|
|                          |     | 1x10 <sup>5</sup> PFU dose |      |       | 1x10 <sup>6</sup> PFU dose |      |       | 5x10 <sup>6</sup> PFU dose |      |      | 1x10 <sup>7</sup> PFU dose |       |      |
|                          | ⊗   | A:Y1                       | A:Y2 | A:Y3  | B:Y1                       | B:Y2 | B:Y3  | C:Y1                       | C:Y2 | C:Y3 | D:Y1                       | D:Y2  | D:Y3 |
| 1                        | P1  | 0.0                        | 10   | 5.0   | 0.0                        | 10   | 55.0  | 125                        | 95   | 60   | 150                        | 85.0  | 150  |
| 2                        | P2  | 0.0                        | 0    | 27.5  | 0.0                        | 55   | 27.5  | 105                        | 105  | 10   | 0                          | 52.5  | 45   |
| 3                        | P3  | 0.0                        | 70   | 115.0 | 25.0                       | 170  | 215.0 | 165                        | 155  | 160  | 220                        | 345.0 | 170  |
| 4                        | P4  | 0.0                        | 0    | 95.0  | 0.0                        | 45   | 65.0  | 65                         | 95   | 40   | 120                        | 115.0 | 45   |
| 5                        | P5  | 0.0                        | 0    | 0.0   | 0.0                        | 15   | 75.0  | 55                         | 0    | 0    | 90                         | 65.0  | 50   |
| 6                        | P6  | 0.0                        | 0    | 17.5  | 12.5                       | 10   | 47.5  | 55                         | 15   | 70   | 110                        | 85.0  | 80   |
| 7                        | P7  | 0.0                        | 0    | 0.0   | 0.0                        | 0    | 37.5  | 75                         | 75   | 70   | 70                         | 55.0  | 0    |
| 8                        | P8  | 0.0                        | 0    | 27.5  | 0.0                        | 0    | 0.0   | 25                         | 115  | 40   | 40                         | 0.0   | 40   |
| 9                        | P9  | 0.0                        | 0    | 0.0   | 22.5                       | 0    | 0.0   | 65                         | 65   | 20   | 0                          | 75.0  | 60   |
| 10                       | P10 | 0.0                        | 0    | 27.5  | 0.0                        | 40   | 35.0  | 65                         | 65   | 60   | 190                        | 175.0 | 0    |
| 11                       | P11 | 0.0                        | 0    | 0.0   | 0.0                        | 55   | 75.0  | 55                         | 35   | 40   | 160                        | 75.0  | 40   |
| 12                       | P12 | 0.0                        | 0    | 15.0  | 5.0                        | 10   | 105.0 | 105                        | 165  | 60   | 150                        | 125.0 | 90   |













Fig 4A-1

| Table format:<br>Grouped |            | Group A |      |      |      | Group B    |      |      |      |
|--------------------------|------------|---------|------|------|------|------------|------|------|------|
|                          |            | Control |      |      |      | FILOcep1&2 |      |      |      |
|                          | ⊗          | A:Y1    | A:Y2 | A:Y3 | A:Y4 | B:Y1       | B:Y2 | B:Y3 | B:Y4 |
| 1                        | Pool 3     | 80      | 70   | 20   | 120  | 3290       | 1910 | 3210 | 3060 |
| 2                        | Pool 12    | 200     | 90   | 10   | 40   | 2730       | 3970 | 4710 | 6430 |
| 3                        | No peptide | 190     | 40   | 0    | 130  | 110        | 40   | 120  | 90   |







Fig 4B-4

| Table format: |       | X   | Group A | Group B            |
|---------------|-------|-----|---------|--------------------|
| Survival      |       | DPI | Control | FiloCep vaccinated |
|               | ✕     | X   | Y       | Y                  |
| 1             | Title | 4   | 1       |                    |
| 2             | Title | 4   | 1       |                    |
| 3             | Title | 5   | 1       |                    |
| 4             | Title | 5   | 1       |                    |
| 5             | Title | 5   | 1       |                    |
| 6             | Title | 6   | 1       |                    |
| 7             | Title | 6   | 1       |                    |
| 8             | Title | 7   | 1       |                    |
| 9             | Title | 28  |         | 0                  |
| 10            | Title | 28  |         | 0                  |
| 11            | Title | 28  |         | 0                  |
| 12            | Title | 28  |         | 0                  |
| 13            | Title | 28  |         | 0                  |
| 14            | Title | 28  |         | 0                  |
| 15            | Title | 28  |         | 0                  |
| 16            | Title | 28  |         | 0                  |



Fig 4B-6

| Table format:<br>Survival |       | X   | Group A | Group B            |
|---------------------------|-------|-----|---------|--------------------|
|                           |       | DPI | Control | FiloCep vaccinated |
|                           | ✕     | X   | Y       | Y                  |
| 1                         | Title | 6   | 1       |                    |
| 2                         | Title | 6   | 1       |                    |
| 3                         | Title | 6   | 1       |                    |
| 4                         | Title | 6   | 1       |                    |
| 5                         | Title | 6   | 1       |                    |
| 6                         | Title | 7   | 1       |                    |
| 7                         | Title | 7   | 1       |                    |
| 8                         | Title | 7   | 1       |                    |
| 9                         | Title | 28  |         | 0                  |
| 10                        | Title | 28  |         | 0                  |
| 11                        | Title | 28  |         | 0                  |
| 12                        | Title | 28  |         | 0                  |
| 13                        | Title | 28  |         | 0                  |
| 14                        | Title | 28  |         | 0                  |
| 15                        | Title | 28  |         | 0                  |
| 16                        | Title |     |         |                    |









Fig 5C-3

|    |     | X   | Group A |      |      |      |      |      |      |      | Group B    |      |      |      |      |      |      |      |
|----|-----|-----|---------|------|------|------|------|------|------|------|------------|------|------|------|------|------|------|------|
|    |     | DPI | Control |      |      |      |      |      |      |      | FILOcep1&2 |      |      |      |      |      |      |      |
|    | ⊗   | X   | A:Y1    | A:Y2 | A:Y3 | A:Y4 | A:Y5 | A:Y6 | A:Y7 | A:Y8 | B:Y1       | B:Y2 | B:Y3 | B:Y4 | B:Y5 | B:Y6 | B:Y7 | B:Y8 |
| 1  | TiU | 1   | 21.5    | 19.9 | 19.8 | 21.9 | 23.3 | 20.7 | 24.2 | 19.6 | 21.4       | 21.1 | 23.4 | 22.2 | 21.5 | 22.7 | 20.0 | 18.6 |
| 2  | TiU | 2   | 21.7    | 20.3 | 20.3 | 22.5 | 23.4 | 20.9 | 24.3 | 20.2 | 22.0       | 21.3 | 23.1 | 22.6 | 22.0 | 22.6 | 20.4 | 19.2 |
| 3  | TiU | 3   | 21.1    | 20.2 | 20.1 | 21.7 | 23.1 | 20.1 | 23.1 | 19.7 | 22.0       | 21.7 | 22.4 | 22.2 | 21.7 | 22.7 | 20.0 | 19.3 |
| 4  | TiU | 4   | 20.9    | 18.8 | 18.4 | 20.8 | 21.9 | 18.6 | 22.2 | 19.0 | 22.5       | 21.9 | 22.6 | 22.5 | 21.8 | 22.4 | 20.6 | 19.0 |
| 5  | TiU | 5   | 19.8    | 19.0 | 18.3 | 20.0 | 21.8 | 18.2 | 21.6 | 18.0 | 22.5       | 22.0 | 22.8 | 22.6 | 22.1 | 22.6 | 20.8 | 21.0 |
| 6  | TiU | 6   | 18.1    | 17.4 | 16.6 | 18.3 | 19.9 | 16.7 | 19.9 | 16.8 | 22.3       | 22.4 | 22.7 | 23.2 | 22.9 | 22.1 | 21.0 | 19.7 |
| 7  | TiU | 7   |         | 17.2 |      |      | 19.5 |      |      |      | 22.7       | 22.7 | 23.5 | 23.6 | 23.7 | 23.7 | 22.3 | 20.5 |
| 8  | TiU | 8   |         |      |      |      |      |      |      |      | 22.5       | 22.1 | 22.8 | 23.3 | 22.2 | 22.3 | 21.4 | 20.1 |
| 9  | TiU | 9   |         |      |      |      |      |      |      |      | 22.4       | 21.8 | 22.0 | 22.9 | 22.4 | 23.1 | 21.7 | 19.7 |
| 10 | TiU | 10  |         |      |      |      |      |      |      |      | 22.3       | 21.6 | 22.2 | 23.0 | 22.5 | 23.7 | 21.5 | 20.0 |
| 11 | TiU | 11  |         |      |      |      |      |      |      |      | 21.6       | 21.8 | 22.4 | 23.8 | 22.7 | 24.0 | 21.3 | 20.6 |
| 12 | TiU | 12  |         |      |      |      |      |      |      |      | 22.4       | 22.2 | 23.3 | 23.5 | 22.2 | 21.5 | 22.0 | 20.6 |
| 13 | TiU | 13  |         |      |      |      |      |      |      |      | 21.6       | 22.6 | 23.2 | 23.1 | 22.7 | 22.9 | 21.6 | 21.4 |
| 14 | TiU | 14  |         |      |      |      |      |      |      |      | 22.0       | 22.8 | 23.6 | 23.1 | 23.1 | 24.0 | 22.1 | 20.9 |



Fig 5C-4

| Table format: |       | X   | Group A | Group B    | Gr |
|---------------|-------|-----|---------|------------|----|
| Survival      |       | DPI | Control | FIL0cep1&2 |    |
|               | ⊗     | X   | Y       | Y          |    |
| 1             | Title | 7   | 1       |            |    |
| 2             | Title | 7   | 1       |            |    |
| 3             | Title | 7   | 1       |            |    |
| 4             | Title | 7   | 1       |            |    |
| 5             | Title | 7   | 1       |            |    |
| 6             | Title | 8   | 1       |            |    |
| 7             | Title | 8   | 1       |            |    |
| 8             | Title | 6   | 1       |            |    |
| 9             | Title | 28  |         | 0          |    |
| 10            | Title | 28  |         | 0          |    |
| 11            | Title | 28  |         | 0          |    |
| 12            | Title | 28  |         | 0          |    |
| 13            | Title | 28  |         | 0          |    |
| 14            | Title | 28  |         | 0          |    |
| 15            | Title | 28  |         | 0          |    |
| 16            | Title | 28  |         | 0          |    |
| 17            | Title |     |         |            |    |



Fig 5C-6

|  |     | X   | Group A | Group B    | Gro |
|-----------------------------------------------------------------------------------|-----|-----|---------|------------|-----|
|                                                                                   |     | DPI | Control | FIL0cep1&2 | T   |
|                                                                                   | ⊗   | X   | Y       | Y          |     |
| 1                                                                                 | Tid | 8   | 1       |            |     |
| 2                                                                                 | Tid | 8   | 1       |            |     |
| 3                                                                                 | Tid | 8   | 1       |            |     |
| 4                                                                                 | Tid | 8   | 1       |            |     |
| 5                                                                                 | Tid | 7   | 1       |            |     |
| 6                                                                                 | Tid | 6   | 1       |            |     |
| 7                                                                                 | Tid | 9   | 1       |            |     |
| 8                                                                                 | Tid | 28  | 0       |            |     |
| 9                                                                                 | Tid | 28  |         | 0          |     |
| 10                                                                                | Tid | 28  |         | 0          |     |
| 11                                                                                | Tid | 28  |         | 0          |     |
| 12                                                                                | Tid | 28  |         | 0          |     |
| 13                                                                                | Tid | 28  |         | 0          |     |
| 14                                                                                | Tid | 28  |         | 0          |     |
| 15                                                                                | Tid | 28  |         | 0          |     |
| 16                                                                                | Tid | 28  |         | 0          |     |
| 17                                                                                | Tid |     |         |            |     |
